# Supplementary material
Source: PubMed Central journal article supplement (PMC4433852)
Supplement: NIHMS674654-supplement-1.pdf [file NIHMS674654-supplement-1.pdf]

# Suppl Fig 1

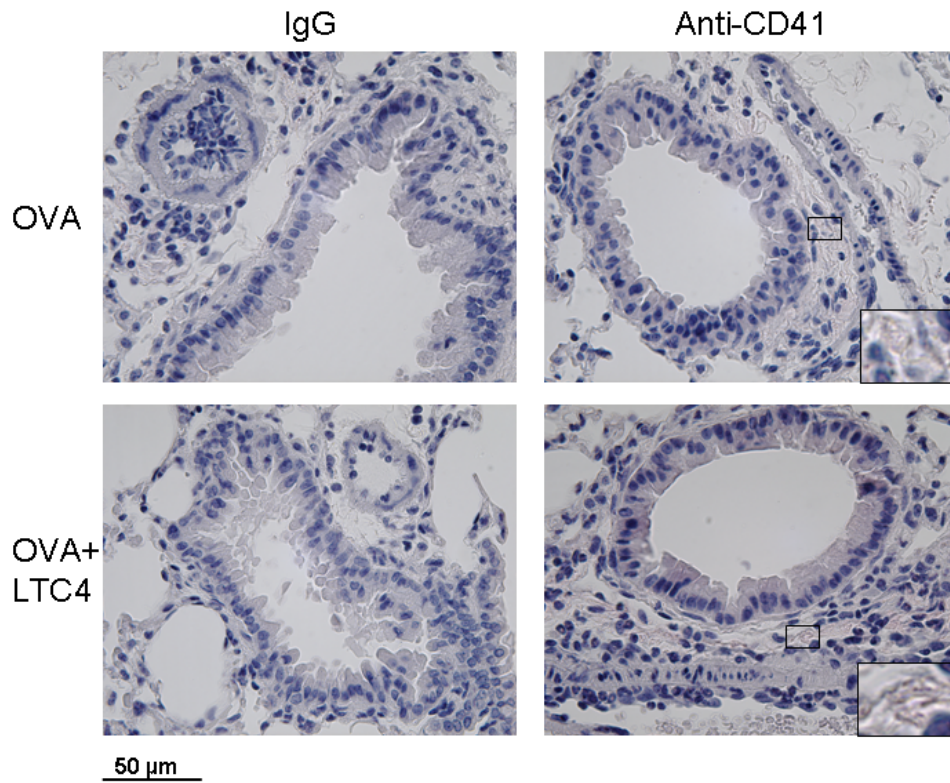

**Supplemental Figure 1.** Immunostaining of representative lung sections from OVA sensitized mice treated with vehicle or LTC<sub>4</sub> on three occasions prior to inhalation of OVA. CD41 immunoreactivity was detected in the bronchial submucosa of both groups (insets).

## Suppl Fig 2

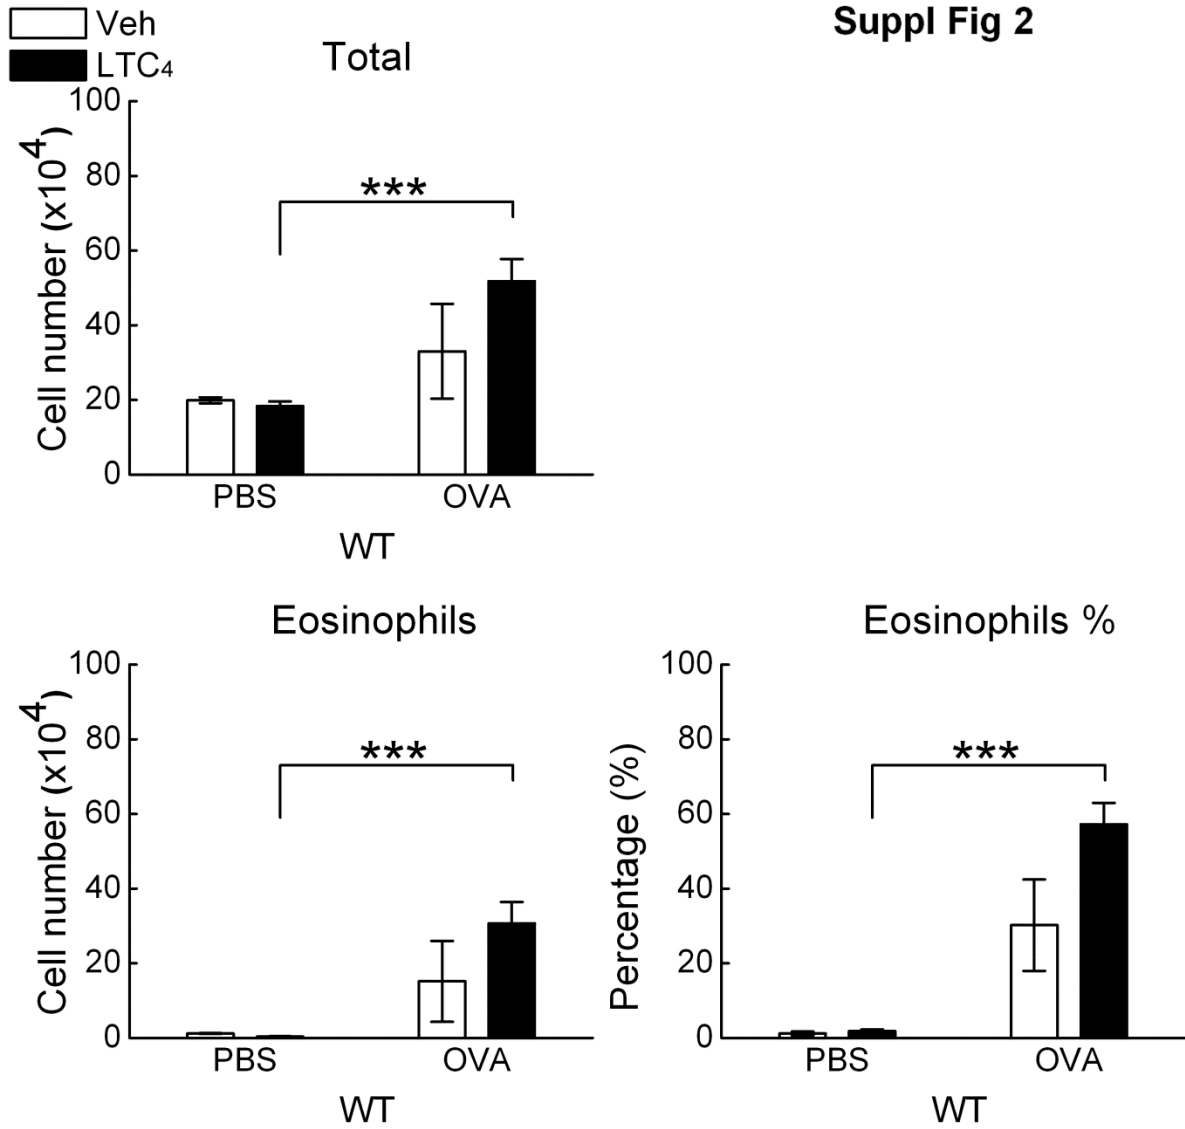

**Supplemental Figure 2.** Effect of challenges with LTC<sub>4</sub> with PBS and LTC<sub>4</sub> with OVA on BAL fluid cellularity in OVA-sensitized mice. Results are from 5 mice/group. \*\*\* p<0.001.

## Suppl Fig 3

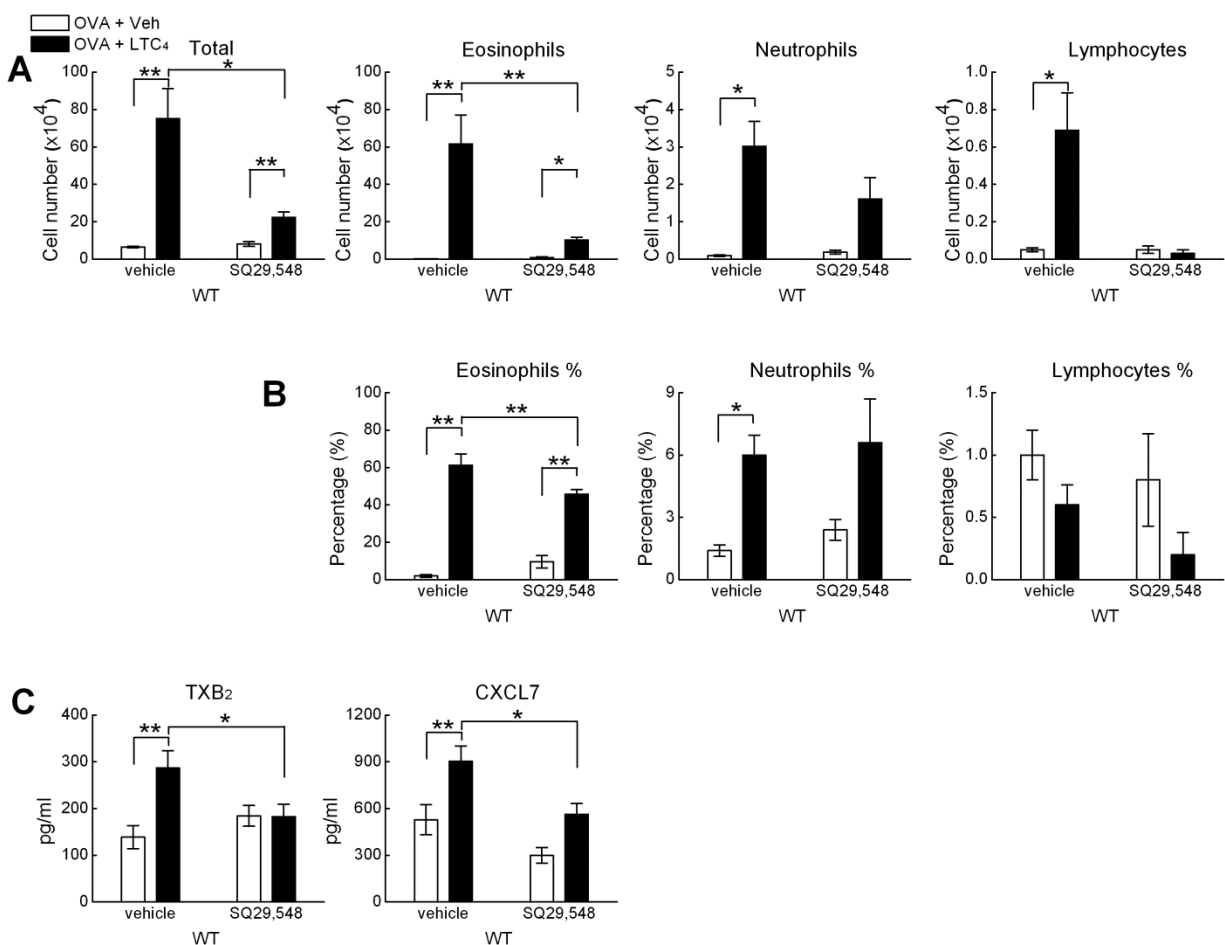

**Supplemental Figure 3.** Effect of the selective TP receptor antagonist SQ29,548 on LTC<sub>4</sub>-amplified pulmonary inflammation. **A.** Total BAL fluid cell numbers, eosinophils, neutrophils and lymphocytes in mice challenged with OVA with or without LTC<sub>4</sub>. The indicated mice received I.P. doses of SQ 29,548 on each day of LTC<sub>4</sub> challenges. **B.** Percentages of eosinophils, neutrophils and lymphocytes from the same mice. **C.** BAL fluid levels of TXB<sub>2</sub> and CXCL7. Results are from 5 mice/group. \* p<0.05, \*\* p<0.01.
